# Supplementary material for: Runoff and focused groundwater-recharge response to flooding rains in the arid zone of Australia
Source: Springer Nature journal article supplement (doi:10.1007/s10040-020-02284-x), 2021-01-07
Supplement: MOESM1 [file 18748930]

**Runoff and focused groundwater-recharge response to flooding rains in the arid zone of Australia**

R. Ian Acworth<sup>1</sup>, Gabriel C. Rau<sup>1,2,\*</sup>, Mark O. Cuthbert<sup>1,3</sup>, Keith Leggett<sup>4</sup>, Martin S. Andersen<sup>1</sup>

1. *Connected Waters Initiative Research Centre (CWI), School of Civil and Environmental Engineering, UNSW Sydney, King Street, Manly Vale 2093, Australia.*

2. *Institute of Applied Geosciences, Karlsruhe Institute of Technology (KIT), Karlsruhe, Germany*

3. *School of Earth and Ocean Sciences, Cardiff University, Cardiff, United Kingdom*

4. *Fowlers Gap Arid Zone Research Station, UNSW Sydney, Fowlers Gap, Australia*

\* Corresponding author: Gabriel C. Rau ([gabriel.rau@kit.edu](mailto:gabriel.rau@kit.edu)), Tel: +49 721 608 43097

Table S1: Installation of boreholes. Dip 1 was for 7<sup>th</sup> August 2013; Dip2 was for 13<sup>th</sup> Oct 2019.

| Line | Borehole | Diam.<br>(mm) | Easting<br>(570000) | Northing<br>(6500000) | Depth<br>(m) | Slots   | Elevation<br>(m AHD) | Dip1  | Dip2  |
|------|----------|---------------|---------------------|-----------------------|--------------|---------|----------------------|-------|-------|
| 1    | FG75     | 50            | -113.362            | +61826.401            | 9.0          | 2 - 5   | 166.19               | Dry   | Dry   |
|      | FG77     | 50            | +0018.013           | +61826.401            | 5.5          | 2 - 5   | 165.52               | Dry   | Dry   |
| 2    | FG78-1   | 50            | +0299.900           | +61833.184            | 21           | 15 - 18 | 165.90               | 17.00 | 17.80 |
|      | FG78-2   | 80            | +0296.995           | +61832.395            | 72           | 42 - 48 | 165.72               | 42.97 | 42.36 |
|      | FG79     | 50            | +0279.803           | +61761.968            | 27           | 18 - 21 | 165.15               | 16.68 | 17.92 |
|      | FG80     | 50            | +0283.255           | +61712.344            | 25           | 10 - 13 | 168.34               | Dry   | Dry   |
| 3    | FG81-1   | 50            | +2626.835           | +62953.848            | 22           | 13 - 19 | 159.44               | 14.22 | Dry   |
|      | FG81-2   | 80            | +2629.204           | +62955.512            | 77           | 68 - 74 | 159.65               | 74.01 | 74.02 |
|      | FG82-1   | 50            | +2709.063           | +62853.702            | 20           | 12 - 18 | 160.16               | 14.98 | 17.68 |
|      | FG82-2   | 80            | +2711.605           | +62855.528            | 87           | 73 - 79 | 160.24               | 74.56 | -     |
|      | FG86     | 80            | +2847.457           | +62482.124            | 90           | 81 - 87 | 161.86               | 76.31 | 76.31 |

Table S2: Ranked 48-hour consecutive rainfalls. Day is the first day in the 2-day period

| Rank | Date        | Amount | Rank | Date        | Amount |
|------|-------------|--------|------|-------------|--------|
| 1    | 10 Jan 2015 | 164.4  | 16   | 9 Mar 2011  | 69.6   |
| 2    | 19 Feb 1971 | 116.1  | 17   | 14 May 1974 | 67.6   |
| 3    | 14 Jan 1974 | 106.7  | 18   | 27 Jul 1996 | 65.2   |
| 4    | 13 Jan 2011 | 100.6  | 19   | 17 Jan 1996 | 65.2   |
| 5    | 9 Feb 1976  | 99.6   | 20   | 9 May 1974  | 65.0   |
| 6    | 18 Dec 1982 | 98.2   | 21   | 14 Jan 1984 | 64.2   |
| 7    | 20 Feb 1987 | 97.4   | 22   | 1 Mar 2012  | 64.0   |
| 8    | 11 Jan 2011 | 92.8   | 23   | 9 Apr 1974  | 60.5   |
| 9    | 8 May 1989  | 91.0   | 24   | 28 Nov 2010 | 60.0   |
| 10   | 26 Feb 2012 | 91.0   | 25   | 26 Jan 1984 | 58.8   |
| 11   | 20 Feb 2000 | 88.2   | 26   | 21 Feb 2003 | 54.8   |
| 12   | 16 Jan 1993 | 84.8   | 27   | 13 Dec 1975 | 54.6   |
| 13   | 1 Jan 1993  | 84.8   | 28   | 6 Sep 1978  | 53.4   |
| 14   | 11 Jan 1976 | 71.7   | 29   | 4 Mar 2010  | 53.4   |
| 15   | 21 May 1981 | 70.4   | 30   | 6 Feb 2011  | 50.8   |

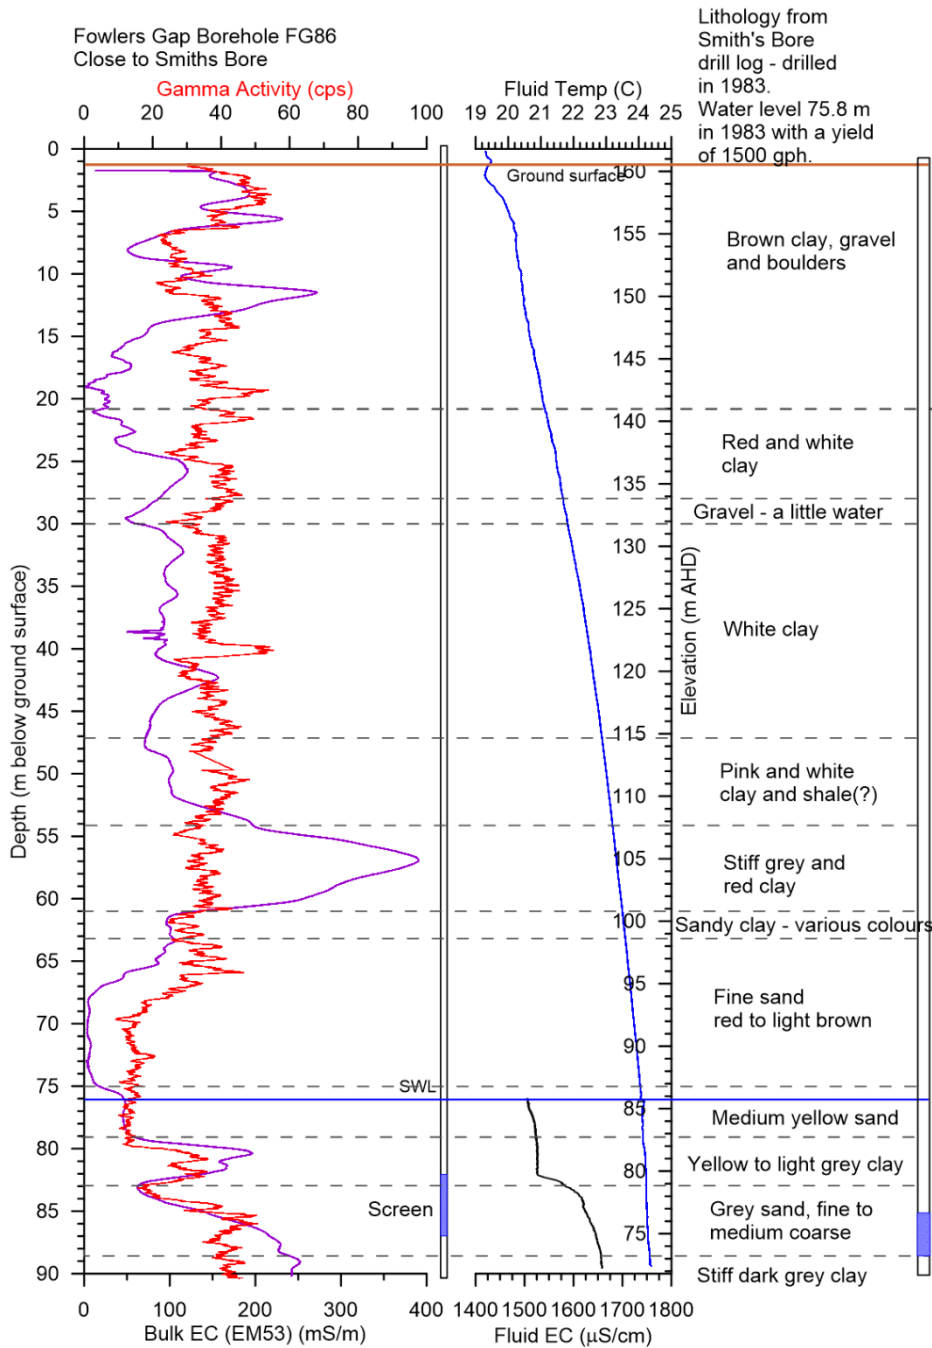

Figure S1: Geophysical logs for FG86 close to Smith's Bore (Figure 4) with the detailed lithology from Smith's Bore recorded at the time of drilling.

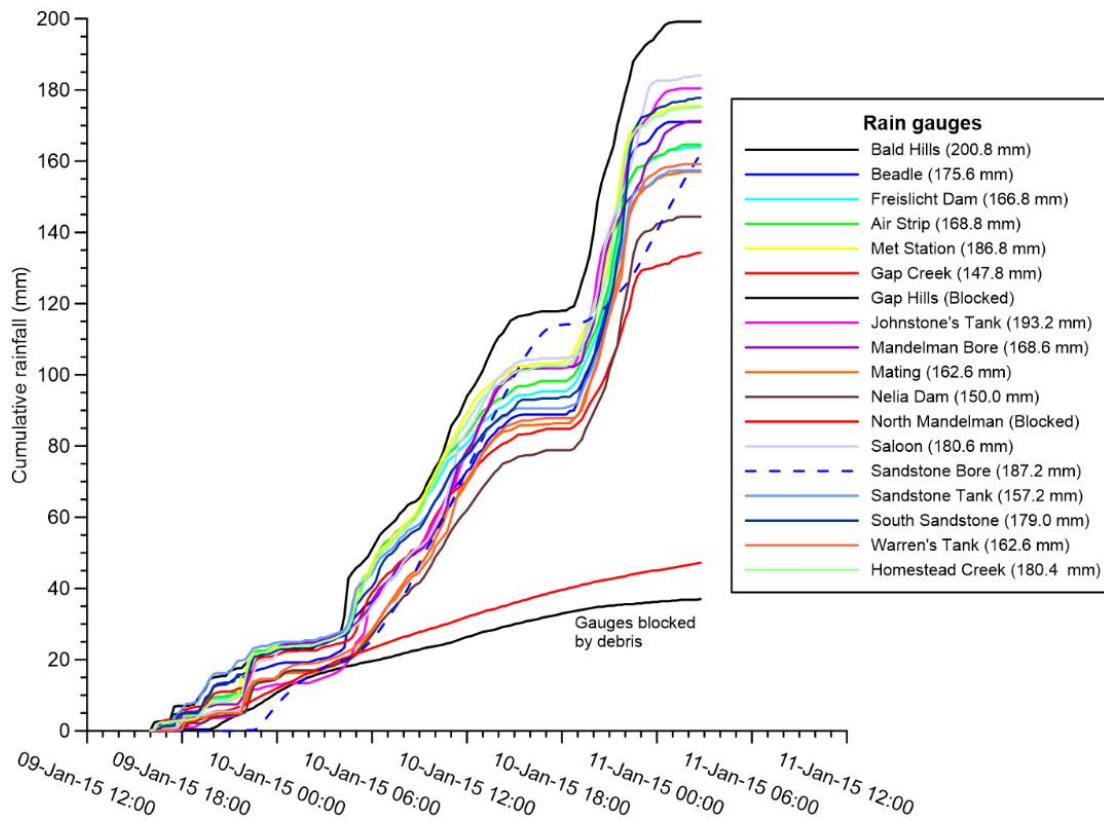

Figure S2: Cumulative rainfall (hyetographs) for all gauges for the January 2015 storm event. The *total for each rain gauge* for the storm is shown in the legend. Note that two gauges became blocked by litter and overflowed.

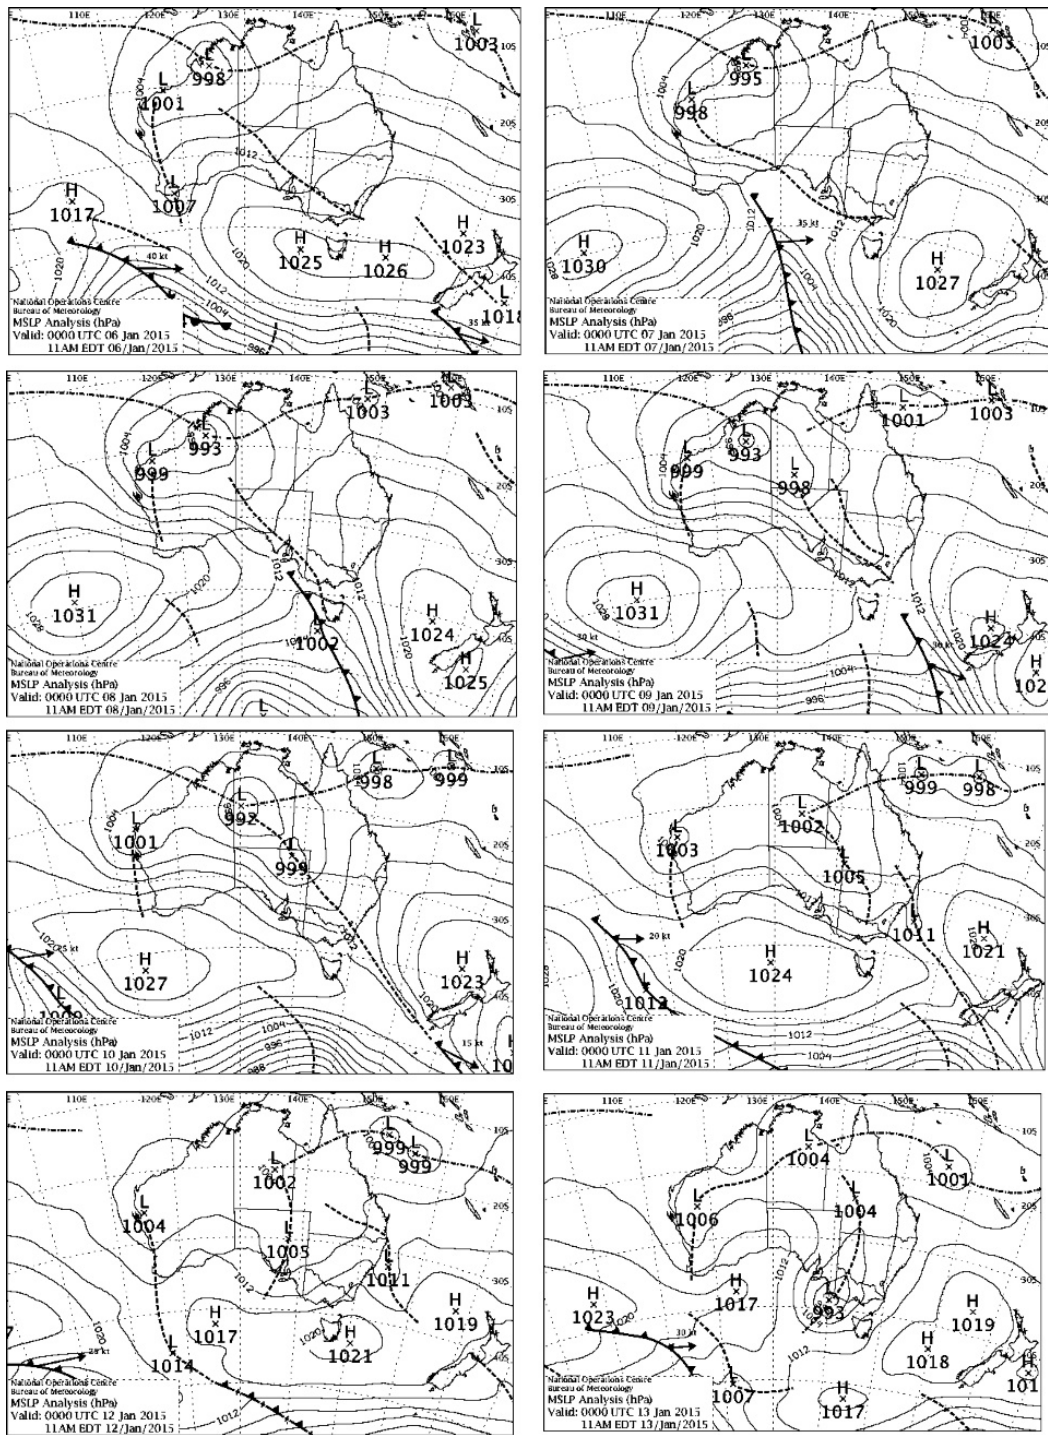

Figure S3: Mean sea level pressure (MSLP) maps for Australia between 6<sup>th</sup> January and 13<sup>th</sup> January, 2015.

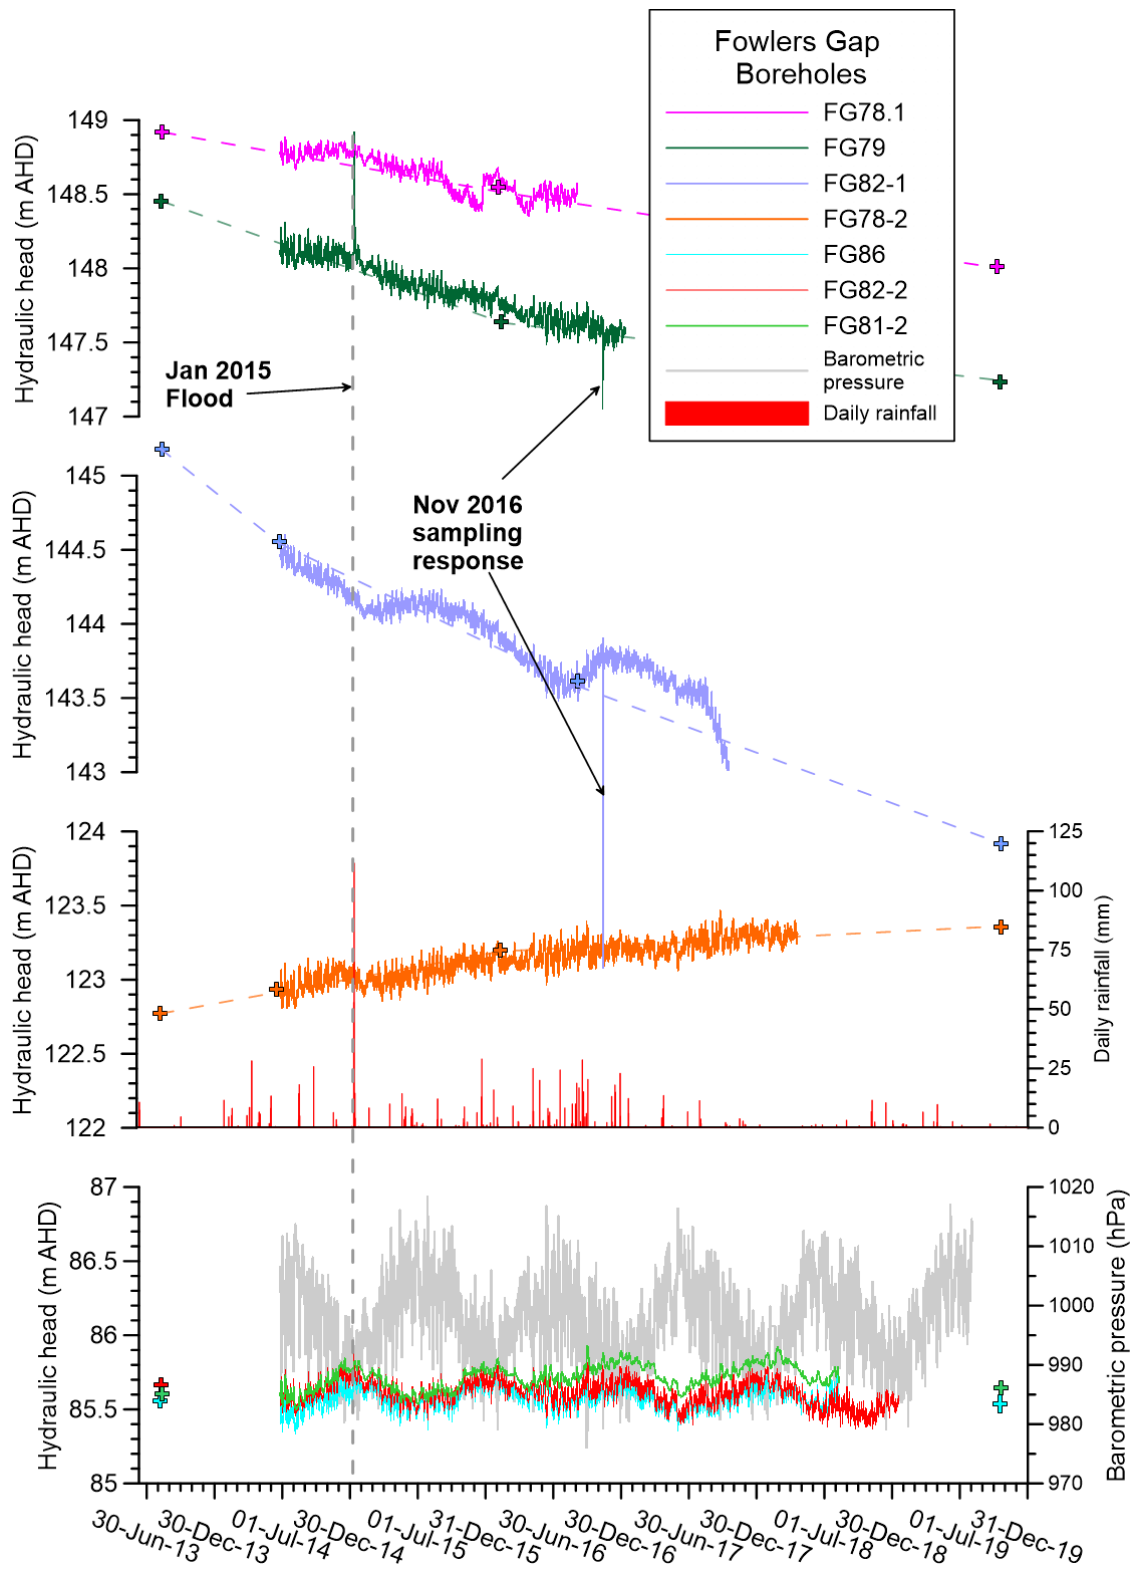

Figure S4: Hydraulic head data (raw data without correction for barometric effects) from the NCRIS borehole monitoring program (2013 to 2019) along with the record of barometric pressure and the daily rainfall. Part records indicate lost data due to system failures. The QA dip measurements are shown by *coloured symbols (crosses)*.
